# Supplementary material
Source: MDPI journal article supplement (https://www.mdpi.com/2073-4441/10/2/156)
Supplement: s1 [file s1]

Article – Supplementary online material

French Reed Bed as a Solution to Minimize the Operational and Maintenance Costs of Wastewater Treatment from a Small Aettlement: an Italian Example

Anacleto Rizzo 1, Riccardo Bresciani1, Nicola Martinuzzi1 and Fabio Masi 1,*

1 IRIDRA Srl, via La Marmora 51, 50121 Florence, Italy; info@iridra.com

***** Correspondence: fmasi@iridra.com

Supplementary online material

1. Results of *t*-Tests

Table S1. p values from the *t*-tests used to verify if the outlet concentrations are significantly different than influent concentrations.

|  | **p**  **IN - OUT1** | **p IN-OUT2** |
| --- | --- | --- |
| COD | 0.0408 | 0.0404 |
| BOD5 | 0.0365 | 0.0361 |
| TN | 0.0036 | 0.0035 |
| NH-4 | 0.0030 | 0.0029 |
| TP | 0.0923 | 0.0939 |
| TSS | 0.0020 | 0.0020 |

Table S2. p values from the *t*-tests used to verify if the outlet concentrations OUT 1 and OUT 2 are significantly different.

|  | **p OUT1-OUT2** |
| --- | --- |
| COD | 0.3796 |
| BOD5 | 0.4813 |
| TN | 0.9003 |
| NH-4 | 0.3755 |
| TP | 0.8295 |
| TSS | 0.6387 |

2. Detailed Results from the Survey

**Table S3.** Detailed energy consumption and costs on a monthly basis for the two years that the FRB WWTP of Castelluccio di Norcia has functioned

| Year | Month | F1  [kWh] | F2  [kWh] | F3  [kWh] | Lost F1  [kWh] | Lost F2  [kWh] | Lost F3  [kWh] | Total Energy consumed  (except lost)  [kWh] | Energy  [€] | Other costs  [€] |  | Total energy cost per month  [€] |
| --- | --- | --- | --- | --- | --- | --- | --- | --- | --- | --- | --- | --- |
| 2015 | 1 | 77 | 62 | 125 | 8 | 6 | 13 | 264 | 15.38 | 71.26 |  | 86.64 |
|  | 2 | 80 | 52 | 103 | 8 | 5 | 11 | 235 | 13.77 | 68.12 |  | 81.89 |
|  | 3 | 95 | 68 | 116 | 10 | 7 | 12 | 279 | 16.41 | 72.89 |  | 89.3 |
|  | 4 | 89 | 52 | 102 | 9 | 5 | 11 | 243 | 14.28 | 69.48 |  | 83.76 |
|  | 5 | 94 | 57 | 88 | 10 | 6 | 9 | 239 | 14.19 | 69.05 |  | 83.24 |
|  | 6 | 81 | 64 | 99 | 8 | 7 | 10 | 244 | 14.37 | 69.56 |  | 83.93 |
|  | 7 | 73 | 58 | 96 | 8 | 6 | 10 | 227 | 13.38 | 68.2 |  | 81.57 |
|  | 8 | 101 | 62 | 140 | 11 | 6 | 15 | 303 | 17.75 | 76.52 |  | 94.27 |
|  | 9 | 99 | 71 | 108 | 10 | 7 | 11 | 278 | 16.38 | 73.76 |  | 90.14 |
|  | 10 | 97 | 67 | 100 | 10 | 7 | 10 | 264 | 15.6 | 73.08 |  | 88.68 |
|  | 11 | 81 | 65 | 90 | 8 | 7 | 9 | 236 | 9.07 | 69.97 |  | 79.04 |
|  | 12 | 60 | 49 | 113 | 6 | 5 | 12 | 222 | 8.91 | 68.41 |  | 77.32 |
|  | **Total** | **1027** | **727** | **1280** | **106** | **74** | **133** | **3034** | **169.49** | **850.3** |  | **1019.78** |
| 2016 | 1 | 93 | 68 | 147 | 10 | 7 | 15 | 308 | 16.2 | 74.82 |  | 91.02 |
|  | 2 | 73 | 47 | 119 | 8 | 5 | 12 | 239 | 9.94 | 67.45 |  | 77.39 |
|  | 3 | 81 | 57 | 107 | 8 | 6 | 11 | 245 | 9.72 | 68.08 |  | 77.8 |
|  | 4 | 60 | 44 | 109 | 6 | 5 | 11 | 213 | 7.81 | 65.51 |  | 73.32 |
|  | 5 | 100 | 64 | 118 | 10 | 7 | 12 | 282 | 11 | 73.16 |  | 84.16 |
|  | 6 | 96 | 74 | 105 | 10 | 8 | 11 | 275 | 11.37 | 72.44 |  | 83.81 |
|  | 7 | 128 | 94 | 118 | 13 | 10 | 12 | 340 | 16.26 | 81.25 |  | 97.51 |
|  | 8 | 109 | 48 | 71 | 11 | 5 | 7 | 228 | 9.2 | 68.29 |  | 77.49 |
|  | 9 | 105 | 47 | 69 | 11 | 5 | 7 | 221 | 10.53 | 67.48 |  | 78.01 |
|  | 10 | 105 | 67 | 96 | 11 | 7 | 10 | 268 | 15.94 | 71.62 |  | 87.56 |
|  | 11 | 83 | 65 | 93 | 9 | 7 | 10 | 241 | 15.76 | 68.66 |  | 84.42 |
|  | 12 | 66 | 50 | 111 | 7 | 5 | 12 | 227 | 14.27 | 67.08 |  | 81.35 |
|  | **Total** | **1099** | **725** | **1263** | **114** | **77** | **130** | **3087** | **148** | **845.84** |  | **993.84** |

**Table S4.** Calendar of inspections done by Water Utility personnel to the FRB WWTP of Castelluccio di Norcia

|  |  | **1** | **2** | **3** | **4** | **5** | **6** | **7** | **8** | **9** | **10** | **11** | **12** | **13** | **14** | **15** | **16** | **17** | **18** | **19** | **20** | **21** | **22** | **23** | **24** | **25** | **26** | **27** | **28** | **29** | **30** | **31** | **Tot. Mon.** |
| --- | --- | --- | --- | --- | --- | --- | --- | --- | --- | --- | --- | --- | --- | --- | --- | --- | --- | --- | --- | --- | --- | --- | --- | --- | --- | --- | --- | --- | --- | --- | --- | --- | --- |
| **2**  **0**  **1**  **4** | **J** |  |  |  |  |  |  |  |  |  |  |  |  |  | 1 |  |  |  |  |  |  |  |  |  |  |  |  |  |  |  | 1 |  | **2** |
| **F** |  |  |  |  |  | 1 |  |  |  |  |  |  |  |  |  |  | 1 |  |  |  |  |  |  |  |  |  |  |  |  |  |  | **2** |
| **M** |  |  |  |  |  |  |  |  |  |  |  | 1 |  | 1 |  |  |  |  |  |  |  |  |  |  |  |  | 1 |  |  |  |  | **3** |
| **A** | 1 |  |  |  |  |  |  |  |  | 1 |  |  |  |  |  |  |  |  |  |  |  |  |  |  |  |  |  |  |  |  |  | **2** |
| **M** |  | 1 |  |  |  |  |  | 1 |  |  |  |  | 1 |  | 1 |  |  |  | 1 |  |  |  |  |  |  |  |  |  |  |  |  | **5** |
| **J** |  |  |  |  |  |  |  |  |  |  | 1 |  |  | 1 |  |  |  |  |  |  |  |  |  |  |  |  |  |  |  |  |  | **2** |
| **J** |  |  |  |  |  |  |  |  |  |  |  |  |  |  |  |  |  |  |  |  |  |  |  |  |  |  |  |  |  |  |  | **0** |
| **A** |  |  |  |  |  |  |  |  |  |  |  |  |  |  |  |  |  |  |  |  |  |  |  |  |  |  |  |  |  |  |  | **0** |
| **S** |  |  |  |  |  |  |  |  |  |  |  |  |  |  |  |  |  |  |  |  |  |  |  |  |  |  |  |  |  |  |  | **0** |
| **O** |  |  |  |  |  |  |  |  |  |  |  |  |  |  |  |  |  |  |  |  |  |  |  |  |  |  |  |  |  |  |  | **0** |
| **N** |  |  |  |  |  |  |  |  |  |  |  |  |  |  |  |  |  |  |  |  |  |  |  |  |  |  |  |  |  |  |  | **0** |
| **D** |  |  |  |  |  |  |  |  |  |  |  |  |  |  |  |  |  |  |  |  |  |  |  |  |  |  |  |  |  |  |  | **0** |
|  |  |  |  |  |  |  |  |  |  |  |  |  |  |  |  |  |  |  |  |  |  |  |  |  |  |  |  |  |  | **Total year** | | | **16** |
| **2**  **0**  **1**  **5** | **J** |  |  |  |  |  |  |  |  |  |  |  |  |  |  |  |  |  |  |  |  |  |  |  |  |  |  |  |  |  |  |  | **0** |
| **F** |  |  |  |  |  |  |  |  |  |  |  |  |  |  |  |  |  |  |  |  |  |  |  |  |  |  |  |  |  |  |  | **0** |
| **M** |  |  |  |  |  |  |  |  |  |  |  |  |  |  |  |  |  |  |  |  |  |  |  |  |  |  |  |  |  |  |  | **0** |
| **A** |  |  |  |  |  |  |  |  |  |  |  |  |  |  |  |  |  |  |  |  |  |  |  |  |  |  |  |  |  |  |  | **0** |
| **M** |  |  |  |  |  |  |  |  |  |  |  |  |  |  |  |  |  |  |  |  |  |  |  |  |  |  |  |  |  |  |  | **0** |
| **J** |  |  |  |  |  |  |  |  |  |  |  |  |  |  |  |  |  |  |  |  |  |  |  |  |  |  |  |  |  |  |  | **0** |
| **J** |  |  |  |  |  |  |  |  |  |  |  |  |  |  |  |  |  |  |  |  |  | 1 |  | 1 |  |  |  |  |  |  |  | **2** |
| **A** |  |  |  | 1 |  | 1 |  |  |  |  |  |  |  |  |  |  |  |  | 1 | 1 |  |  |  |  |  | 1 |  |  |  |  |  | **5** |
| **S** | 1 |  |  |  |  |  |  |  |  |  |  |  |  |  |  |  |  |  |  |  | 1 |  |  |  |  |  |  |  |  |  |  | **2** |
| **O** |  |  |  |  | 1 |  |  |  |  |  |  |  |  |  |  |  |  |  |  |  |  |  |  |  |  |  |  |  | 1 |  |  | **2** |
| **N** |  |  |  |  |  |  |  |  |  | 1 |  |  |  |  |  |  |  |  |  | 1 |  |  |  |  |  |  |  |  |  |  |  | **2** |
| **D** |  |  |  |  |  |  |  |  |  |  | 1 |  |  |  |  |  |  |  |  |  |  |  |  |  |  |  |  |  |  |  |  | **1** |
|  |  |  |  |  |  |  |  |  |  |  |  |  |  |  |  |  |  |  |  |  |  |  |  |  |  |  |  |  |  | **Total year** | | | **14** |
| **2**  **0**  **16** | **J** |  |  |  |  |  |  |  |  |  |  |  |  |  |  |  |  |  |  |  |  |  |  |  |  |  |  |  |  |  |  |  | **0** |
| **F** |  |  |  |  |  |  |  |  |  |  |  |  |  |  |  |  |  |  |  |  |  |  |  |  |  |  |  |  |  |  |  | **0** |
| **M** |  |  |  |  |  |  |  |  |  |  |  |  |  |  |  |  |  |  |  |  |  |  |  |  |  |  |  |  |  |  |  | **0** |
| **A** |  |  |  |  |  |  |  |  |  |  |  |  |  |  |  |  |  |  |  |  |  |  |  |  |  |  |  |  |  |  |  | **0** |
| **M** |  |  |  |  |  |  |  |  |  |  |  |  |  |  |  |  |  |  |  |  |  |  |  |  |  |  |  |  |  |  |  | **0** |
| **J** |  |  |  |  |  |  |  |  |  |  |  |  |  |  |  |  |  |  |  |  |  |  |  |  |  |  |  |  |  |  |  | **0** |
| **J** |  |  |  |  |  |  |  |  |  |  |  |  |  |  |  |  |  |  |  |  |  |  | 1 |  |  |  |  |  |  |  |  | **1** |
| **A** |  | 1 |  | 1 |  |  |  | 1 |  |  |  |  |  |  |  |  |  |  |  |  |  |  |  |  |  |  |  |  |  |  |  | **3** |
| **S** |  |  | 1 |  |  |  |  |  |  |  |  |  |  |  |  |  |  |  |  |  |  |  |  |  |  |  |  |  | 1 |  |  | **2** |
| **O** |  |  |  |  |  |  |  |  |  |  | 1 |  |  |  |  |  |  | 1 |  |  |  |  |  |  |  |  |  |  |  |  |  | **2** |
| **N** |  |  |  |  |  |  |  |  |  |  |  |  |  |  |  |  |  |  |  |  |  |  |  |  |  |  |  |  |  |  |  | **0** |
| **D** |  |  |  |  |  |  |  |  |  |  |  |  |  |  |  |  |  |  |  |  |  |  |  |  |  |  |  |  |  |  |  | **0** |
|  |  |  |  |  |  |  |  |  |  |  |  |  |  |  |  |  |  |  |  |  |  |  |  |  |  |  |  |  |  | **Total year** | | | **8** |

**Table S5.** Calendar of water quality sample done by Water Utility personnel to monitor the FRB WWTP of Castelluccio di Norcia

|  |  | **1** | **2** | **3** | **4** | **5** | **6** | **7** | **8** | **9** | **10** | **11** | **12** | **13** | **14** | **15** | **16** | **17** | **18** | **19** | **20** | **21** | **22** | **23** | **24** | **25** | **26** | **27** | **28** | **29** | **30** | **31** | **Tot. Mon.** |
| --- | --- | --- | --- | --- | --- | --- | --- | --- | --- | --- | --- | --- | --- | --- | --- | --- | --- | --- | --- | --- | --- | --- | --- | --- | --- | --- | --- | --- | --- | --- | --- | --- | --- |
| **2**  **0**  **1**  **4** | **J** |  |  |  |  |  |  |  |  |  |  |  |  |  |  |  |  |  |  |  |  |  |  |  |  |  |  |  |  |  |  |  | **0** |
| **F** |  |  |  |  |  |  |  |  |  |  |  |  |  |  |  |  |  | 3 |  |  |  |  |  |  |  |  |  |  |  |  |  | **3** |
| **M** |  |  |  |  |  |  |  |  |  |  |  |  |  |  |  |  |  |  |  |  |  |  |  |  |  |  | 3 |  |  |  |  | **3** |
| **A** |  |  |  |  |  |  |  |  |  |  |  |  |  |  |  |  |  |  |  |  |  |  |  |  |  |  |  |  |  |  |  | **0** |
| **M** |  |  |  |  |  |  |  |  |  |  |  |  |  |  |  |  |  |  |  |  |  |  |  |  |  | 3 |  |  |  |  |  | **3** |
| **J** |  |  |  |  |  |  |  |  |  |  |  |  |  |  |  |  |  |  |  |  |  |  |  |  |  |  |  |  |  |  |  | **0** |
| **J** |  |  |  |  |  |  |  |  |  |  |  |  |  |  |  |  |  |  |  |  |  |  |  |  |  |  |  |  | 2 |  |  | **2** |
| **A** |  |  |  |  |  |  |  |  |  |  |  |  |  |  |  |  |  |  |  |  |  |  |  |  |  |  |  |  |  |  |  | **0** |
| **S** |  |  |  |  |  |  |  |  |  |  |  |  |  |  |  |  |  |  |  |  |  |  |  |  |  |  |  |  |  |  |  | **0** |
| **O** |  |  |  |  |  |  | 3 |  |  |  |  |  |  |  |  |  |  |  |  |  |  |  |  |  |  |  |  |  |  |  |  | **3** |
| **N** |  |  |  | 2 |  |  |  |  |  |  |  |  |  |  |  |  |  | 3 |  |  |  |  |  |  |  |  |  |  |  |  |  | **5** |
| **D** |  |  |  |  |  |  |  |  |  |  |  |  |  |  | 5 |  |  |  |  |  |  |  |  |  |  |  |  |  |  |  |  | **5** |
|  |  |  |  |  |  |  |  |  |  |  |  |  |  |  |  |  |  |  |  |  |  |  |  |  |  |  |  |  |  | **Total year** | | | **24** |
| **2**  **0**  **1**  **5** | **J** |  |  |  |  |  |  |  |  |  |  |  |  |  |  |  |  |  |  |  |  |  |  |  |  |  |  |  |  |  |  |  | **0** |
| **F** |  |  |  |  |  |  |  |  |  |  |  |  |  |  |  |  |  |  |  |  |  |  |  |  |  |  |  |  |  |  |  | **0** |
| **M** |  |  |  |  |  |  |  |  |  |  |  |  |  |  |  |  |  |  |  |  |  |  |  |  |  |  |  |  |  |  |  | **0** |
| **A** |  |  |  |  |  |  |  |  |  |  |  |  |  |  |  |  |  |  |  |  |  |  |  |  |  |  |  | 2 |  |  |  | **2** |
| **M** |  |  |  |  |  |  |  |  |  |  |  |  |  |  |  |  |  |  | 3 |  |  |  |  |  |  |  |  |  |  |  |  | **3** |
| **J** |  |  |  |  |  |  |  |  |  |  |  |  |  |  |  |  |  |  |  |  |  |  |  |  |  |  |  |  |  |  |  | **0** |
| **J** |  |  |  |  |  |  |  |  |  |  |  |  |  |  |  |  |  |  |  |  |  |  |  |  |  |  |  |  |  |  |  | **0** |
| **A** |  |  |  | 2 |  |  |  |  |  |  |  |  |  |  |  |  |  |  |  |  |  |  |  |  |  |  |  |  |  |  |  | **2** |
| **S** |  |  |  |  |  |  |  |  |  |  |  |  |  |  |  |  |  |  |  |  | 3 |  |  |  |  |  |  |  |  |  |  | **3** |
| **O** |  |  |  |  |  |  |  |  |  |  |  |  |  |  |  |  |  |  |  |  |  |  |  |  |  |  |  |  |  |  |  | **0** |
| **N** |  |  |  |  |  |  |  |  |  |  |  |  |  |  |  |  |  |  |  |  |  |  |  |  |  |  |  |  |  |  |  | **0** |
| **D** |  |  |  |  |  |  |  |  |  |  |  |  |  |  |  |  |  |  |  |  |  |  |  |  |  |  |  |  |  |  |  | **0** |
|  |  |  |  |  |  |  |  |  |  |  |  |  |  |  |  |  |  |  |  |  |  |  |  |  |  |  |  |  |  | **Total year** | | | **10** |
| **2**  **0**  **16** | **J** |  |  |  |  |  |  |  |  |  |  |  |  |  |  |  |  |  |  |  |  |  |  |  |  |  |  |  |  |  |  |  | **0** |
| **F** |  |  |  |  |  |  |  |  |  |  |  |  |  |  |  |  |  |  |  |  |  |  |  |  |  |  |  |  |  |  |  | **0** |
| **M** |  |  |  |  |  |  |  |  |  |  |  |  |  |  |  |  |  |  |  |  |  |  |  |  |  |  |  |  |  |  |  | **0** |
| **A** |  |  |  |  |  |  |  |  |  |  |  |  |  |  |  |  |  |  |  |  |  |  |  |  |  |  |  |  |  |  |  | **0** |
| **M** |  |  |  |  |  |  |  |  |  |  |  |  |  |  |  |  |  | 3 |  |  |  |  |  |  |  |  |  |  |  |  |  | **3** |
| **J** |  |  |  |  |  |  |  |  |  |  |  |  |  |  |  |  |  |  |  |  |  |  |  |  |  |  |  |  |  |  |  | **0** |
| **J** |  |  |  |  |  |  |  |  |  |  |  |  |  |  |  |  |  |  |  |  |  |  |  |  |  |  |  |  |  |  |  | **0** |
| **A** |  |  |  |  |  |  |  |  | 3 |  |  |  |  |  |  |  |  |  |  |  |  |  |  |  |  |  |  |  |  |  |  | **3** |
| **S** |  |  |  |  |  |  |  |  |  |  |  |  |  |  |  |  |  |  |  |  |  |  |  |  |  |  |  |  |  |  |  | **0** |
| **O** |  |  |  |  |  |  |  |  |  |  |  |  |  |  |  |  |  | 3 |  |  |  |  |  |  |  |  |  |  |  |  |  | **3** |
| **N** |  |  |  |  |  |  |  |  |  |  |  |  |  |  |  |  |  |  |  |  |  |  |  |  |  |  |  |  |  |  |  | **0** |
| **D** |  |  |  |  |  |  |  |  |  |  |  |  |  |  |  |  |  |  |  |  |  |  |  |  |  |  |  |  |  |  |  | **0** |
|  |  |  |  |  |  |  |  |  |  |  |  |  |  |  |  |  |  |  |  |  |  |  |  |  |  |  |  |  |  | **Total year** | | | **9** |

© 2018 by the authors. Submitted for possible open access publication under the
terms and conditions of the Creative Commons Attribution (CC BY) license (http://creativecommons.org/licenses/by/4.0/).
